# Supplementary material for: Weather Type Reconstruction using Machine Learning Approaches
Source: Copernicus journal article supplement (doi:10.5194/egusphere-2024-1346), 2024-05-21
Supplement: Supplementary file 1 [file egusphere-2024-1346-supplement.pdf]

## Supplement to the article

# Weather Type Reconstruction using Machine Learning Approaches

Authors: Lucas Pfister<sup>1,2</sup>, Lena Wilhelm<sup>1,2</sup>, Yuri Brugnara<sup>1,2\*</sup>, Noemi Imfeld<sup>1,2</sup>, Stefan Brönnimann<sup>1,2</sup>

- 5 <sup>1</sup> Oeschger Centre for Climate Change Research, University of Bern, Bern, 3012, Switzerland  
<sup>2</sup> Institute of Geography, University of Bern, Bern, 3012, Switzerland

\*now at EMPA, Dübendorf, 8600, Switzerland

## S.1 Predictor correlations

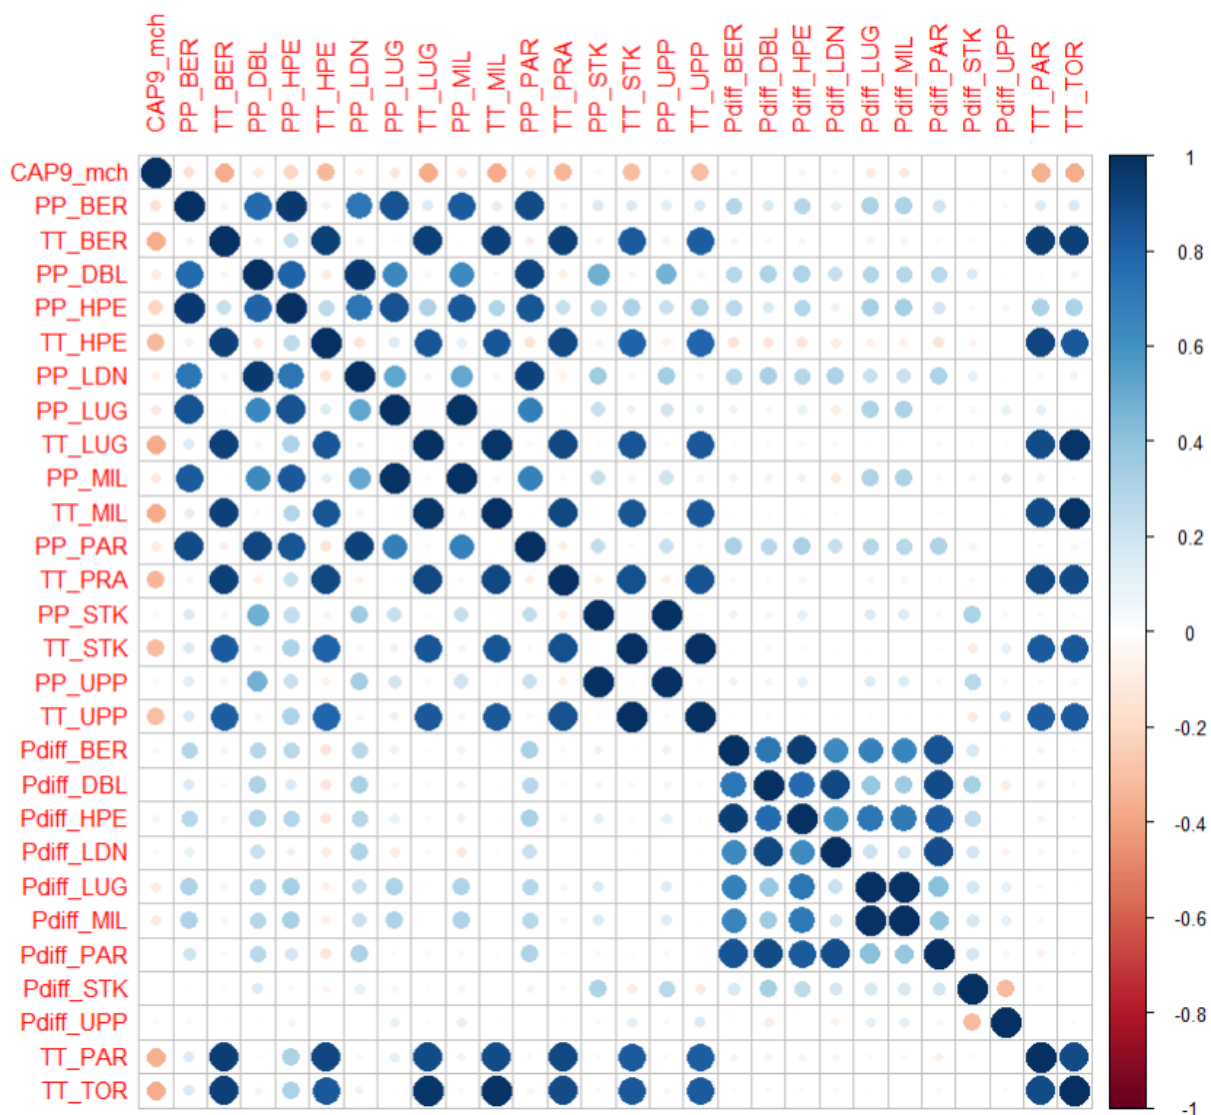

**Figure S1.1:** Correlations between variables used for the model comparison including the weather types (CAP9\_mch). Shown are pearson correlations for the SMD station set with 11 stations as used by Schwander et al. (2017)

## S.2 Multinomial logistic regression (MLG) model coefficients and fitted relationships

**Table S2.1:** Coefficients  $\beta_n$  of the six MLG predictands (PP\_MIL, PP\_PAR, TT\_PRA, TT\_STK, Pdiff\_MIL and Pdiff\_STK) for each CAP9 class. Class one is taken as reference. All predictands are highly significant (not shown).

| Class | Intercept  | PP_MIL  | PP_PAR  | TT_PRA  | TT_STK  | Pdiff_MIL | Pdiff_STK |
|-------|------------|---------|---------|---------|---------|-----------|-----------|
| 2     | 686.3291   | -0.0633 | -0.6142 | 0.1239  | -0.1066 | -0.0765   | -0.0810   |
| 3     | -998.7799  | 1.0667  | -0.0846 | -0.0116 | -0.0506 | -0.0334   | -0.0330   |
| 4     | -1352.5444 | 0.9168  | 0.4126  | -0.2003 | 0.1352  | 0.0356    | 0.0510    |
| 5     | -2597.8647 | 2.0411  | 0.5076  | -0.3536 | 0.1913  | 0.0164    | 0.0499    |
| 6     | 1334.6536  | -0.9174 | -0.4009 | 0.0436  | -0.0416 | -0.0270   | -0.0285   |
| 7     | 2034.2208  | -0.9707 | -1.0427 | 0.2170  | -0.1497 | -0.1160   | -0.1034   |
| 8     | -4061.5719 | 2.9962  | 0.9768  | -0.6759 | 0.3139  | 0.0585    | 0.0834    |
| 9     | 2957.1726  | -1.7344 | -1.1998 | 0.2361  | -0.1795 | -0.0607   | -0.0881   |

10

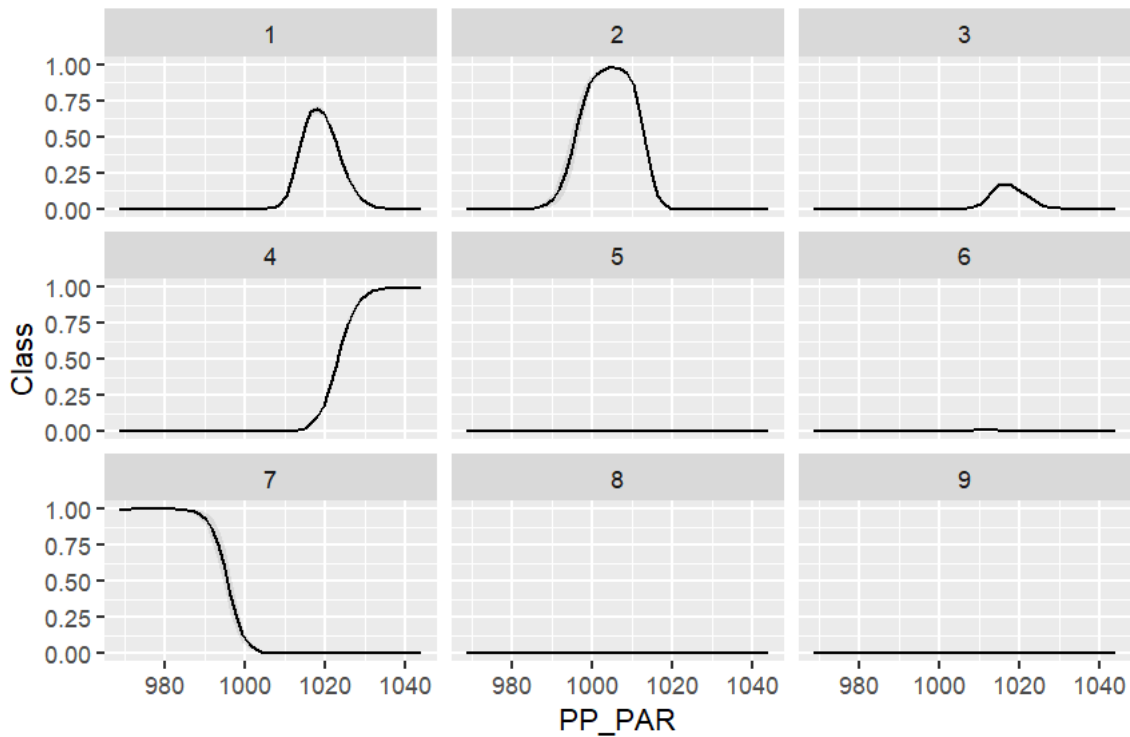

**Figure S2.1:** Fitted model relationships of the predictand PP\_PAR per CAP9 class. The probability of the respective class (y-axes) is plotted against the values of PP\_PAR in hPa (x-axes).

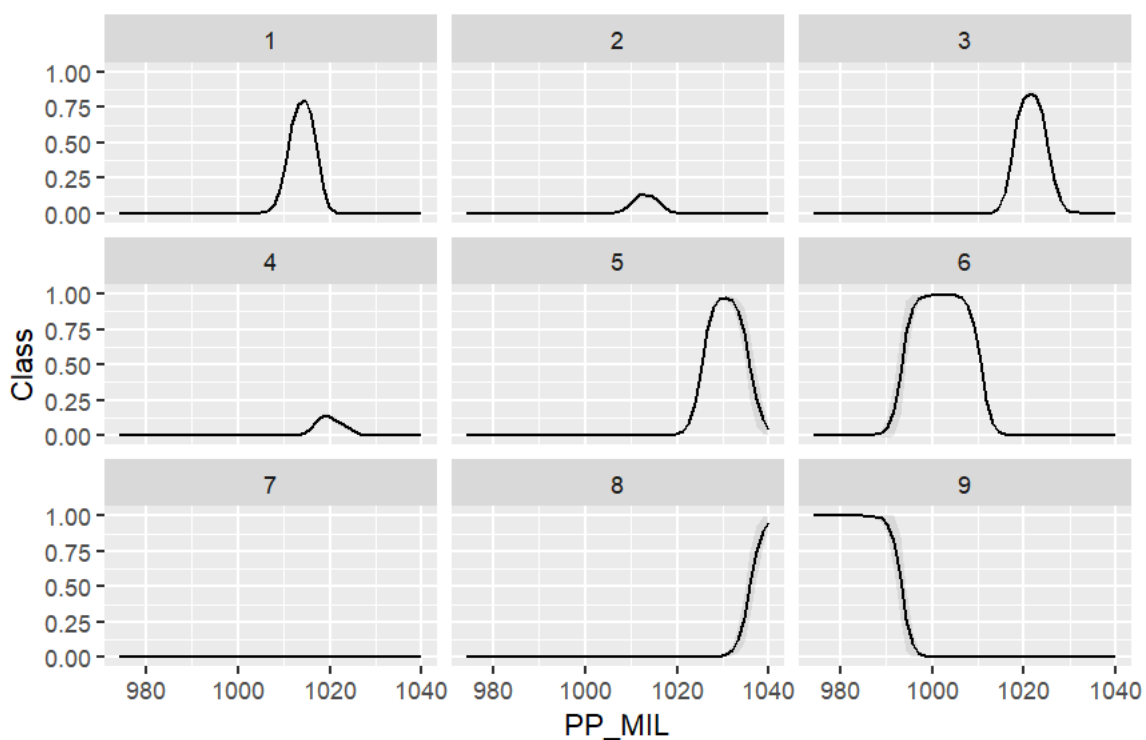

**Figure S2.2:** As figure S2.1, but for PP\_MIL.

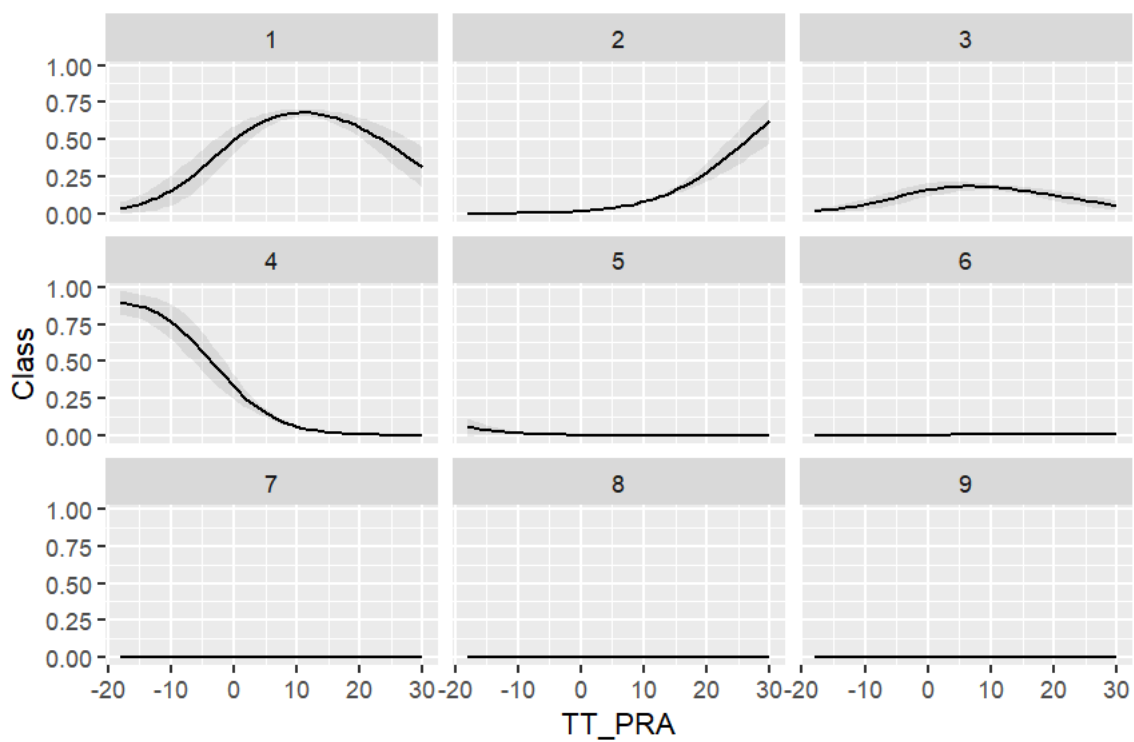

**Figure S2.3:** As figure S2.1, but for TT\_PRA.

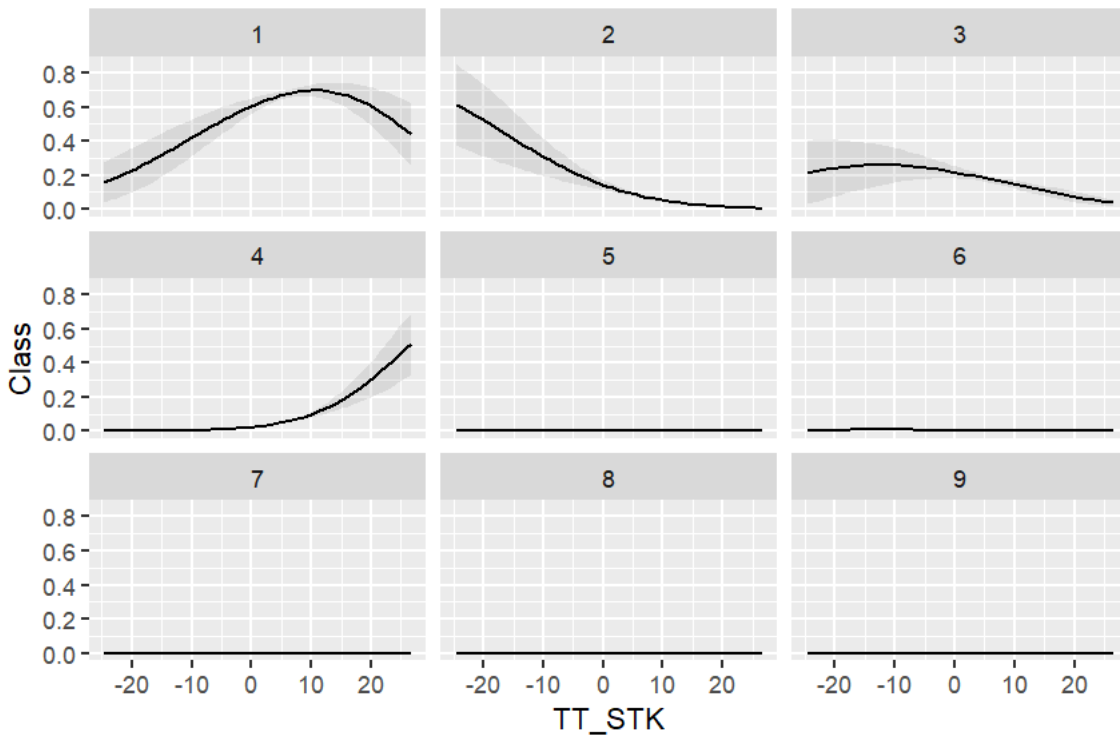

15

**Figure S2.4:** As figure S2.1, but for *TT\_STK*.

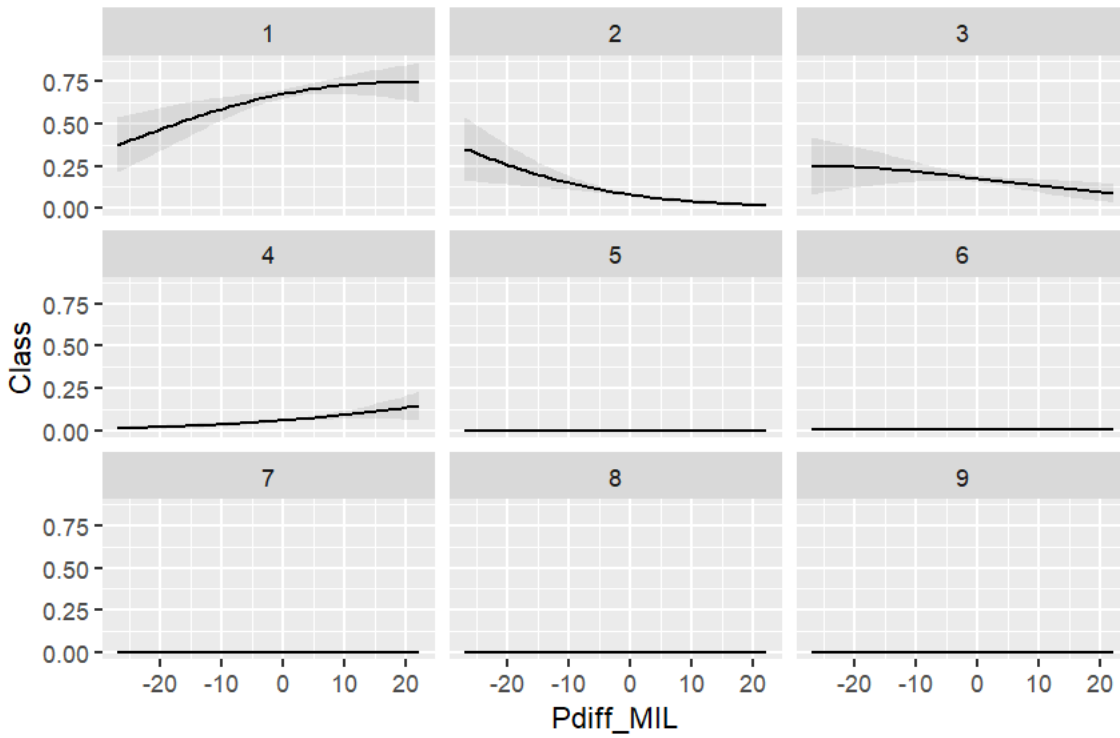

**Figure S2.5:** As figure S2.1, but for *Pdiff\_MIL*.

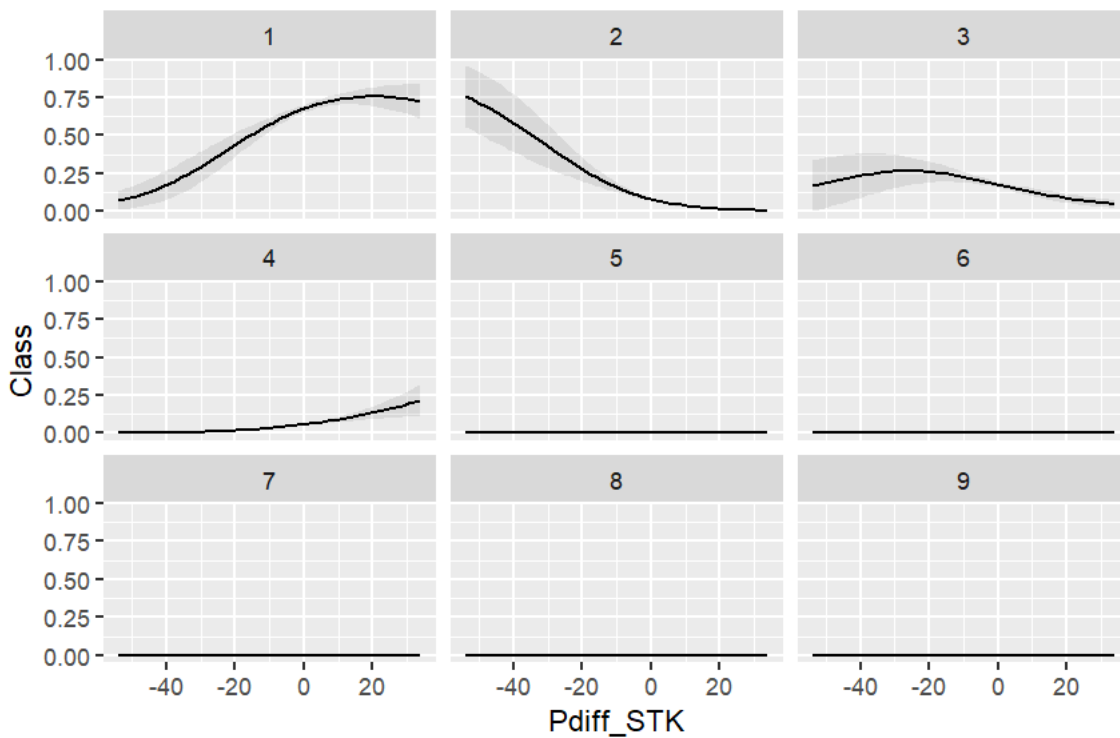

**Figure S2.6:** As figure S2.1, but for *Pdiff\_STK*.

### S.3 Random Forests (RF): Feature Importance

- 20 Feature importance (average reduction of the Gini impurity or entropy in the split classes for each feature (predictor) over all trees) of the random forest input data on the example of the SMD stationset with 11 stations as used by Schwander et al. (2017)

| input Variable | feature importance | input Variable | feature importance |
|----------------|--------------------|----------------|--------------------|
| PP_LUG         | 0.1580             | TT_SMA         | 0.0106             |
| PP_MIL         | 0.1434             | TT_TOR         | 0.0105             |
| PP_DBL         | 0.1057             | TT_PAR         | 0.0093             |
| PP_BAS         | 0.0811             | TT_UPP         | 0.0077             |
| PP_SMA         | 0.0804             | TT_STK         | 0.0075             |
| PP_HPE         | 0.0712             | Pdiff_DBL      | 0.0069             |
| PP_PAR         | 0.0606             | Pdiff_HPE      | 0.0067             |
| PP_BER         | 0.0473             | Pdiff_STK      | 0.0066             |
| PP_LDN         | 0.0433             | Pdiff_MIL      | 0.0065             |
| PP_STK         | 0.0139             | Pdiff_LDN      | 0.0063             |
| PP_UPP         | 0.0127             | Pdiff_PAR      | 0.0063             |
| TT_PRA         | 0.0119             | Pdiff_BAS      | 0.0061             |
| TT_LUG         | 0.0118             | Pdiff_BER      | 0.0059             |
| TT_HPE         | 0.0117             | Pdiff_LUG      | 0.0058             |
| TT_BER         | 0.0112             | Pdiff_UPP      | 0.0058             |
| TT_MIL         | 0.0110             | Pdiff_SMA      | 0.0057             |
| TT_BAS         | 0.0108             |                |                    |

## S.4 Neural Network (NN) Architectures

25 Architectures of the best neural network (NN) models for the input data station sets used for the CAP9 reconstructions. They typically contain between 2 and 5 layers (with between 32 and 224 neurons) and (as predefined) a dropout layer. Input and output layers are shown for completeness. The following flowcharts indicate on the left the layer type (in the terminology of the keras library), the activation function (relu or softmax), and the data format, and on the right

30 the size of the input and output of the respective layers. The dimension 'None' represents the variable time dimension.

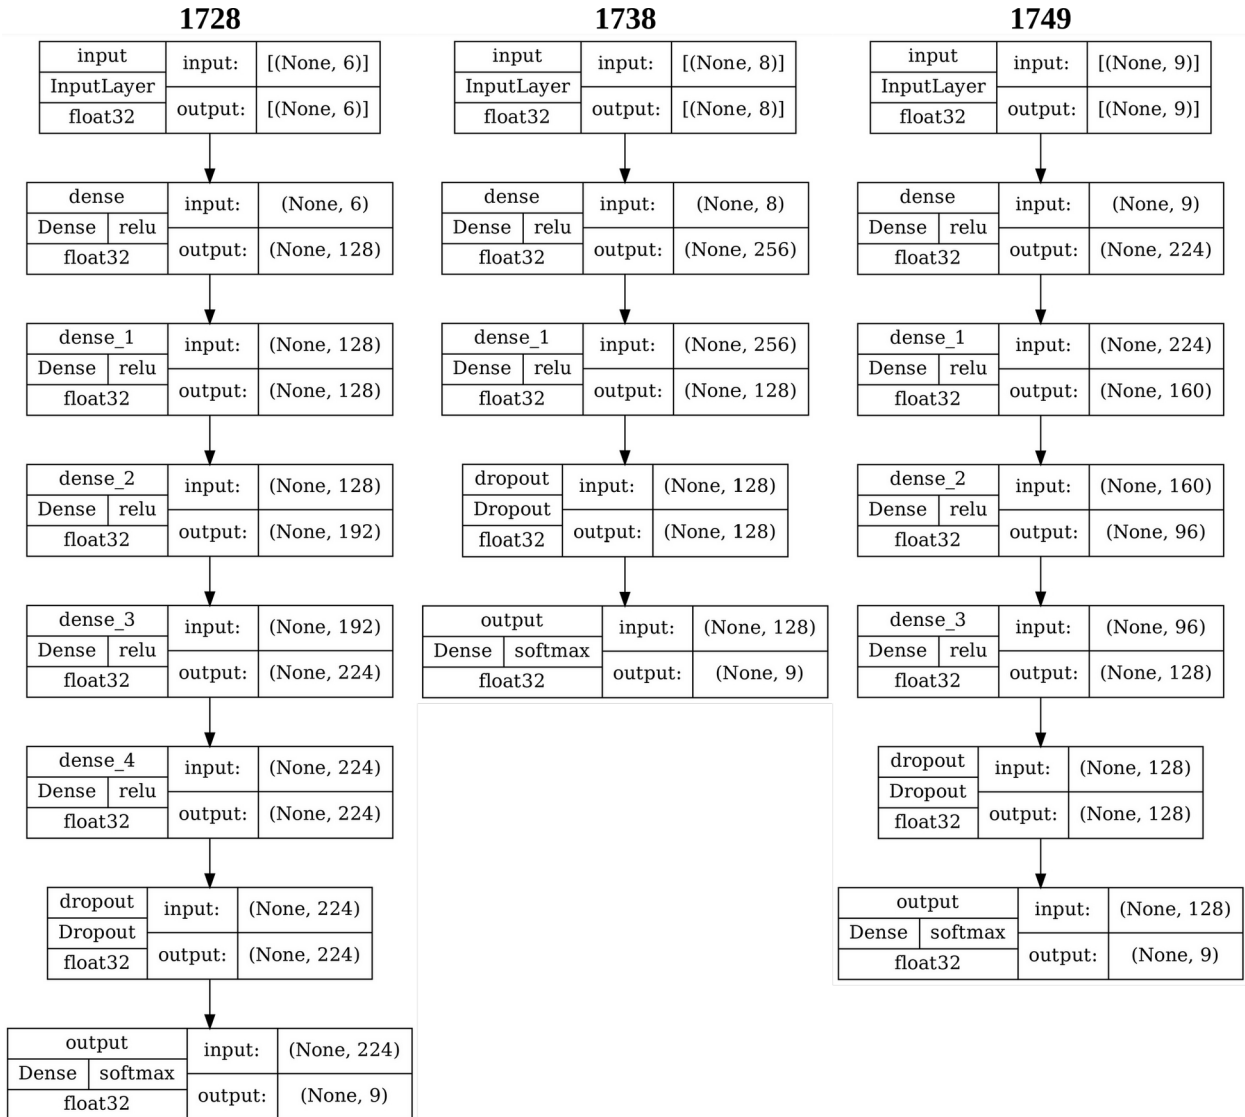

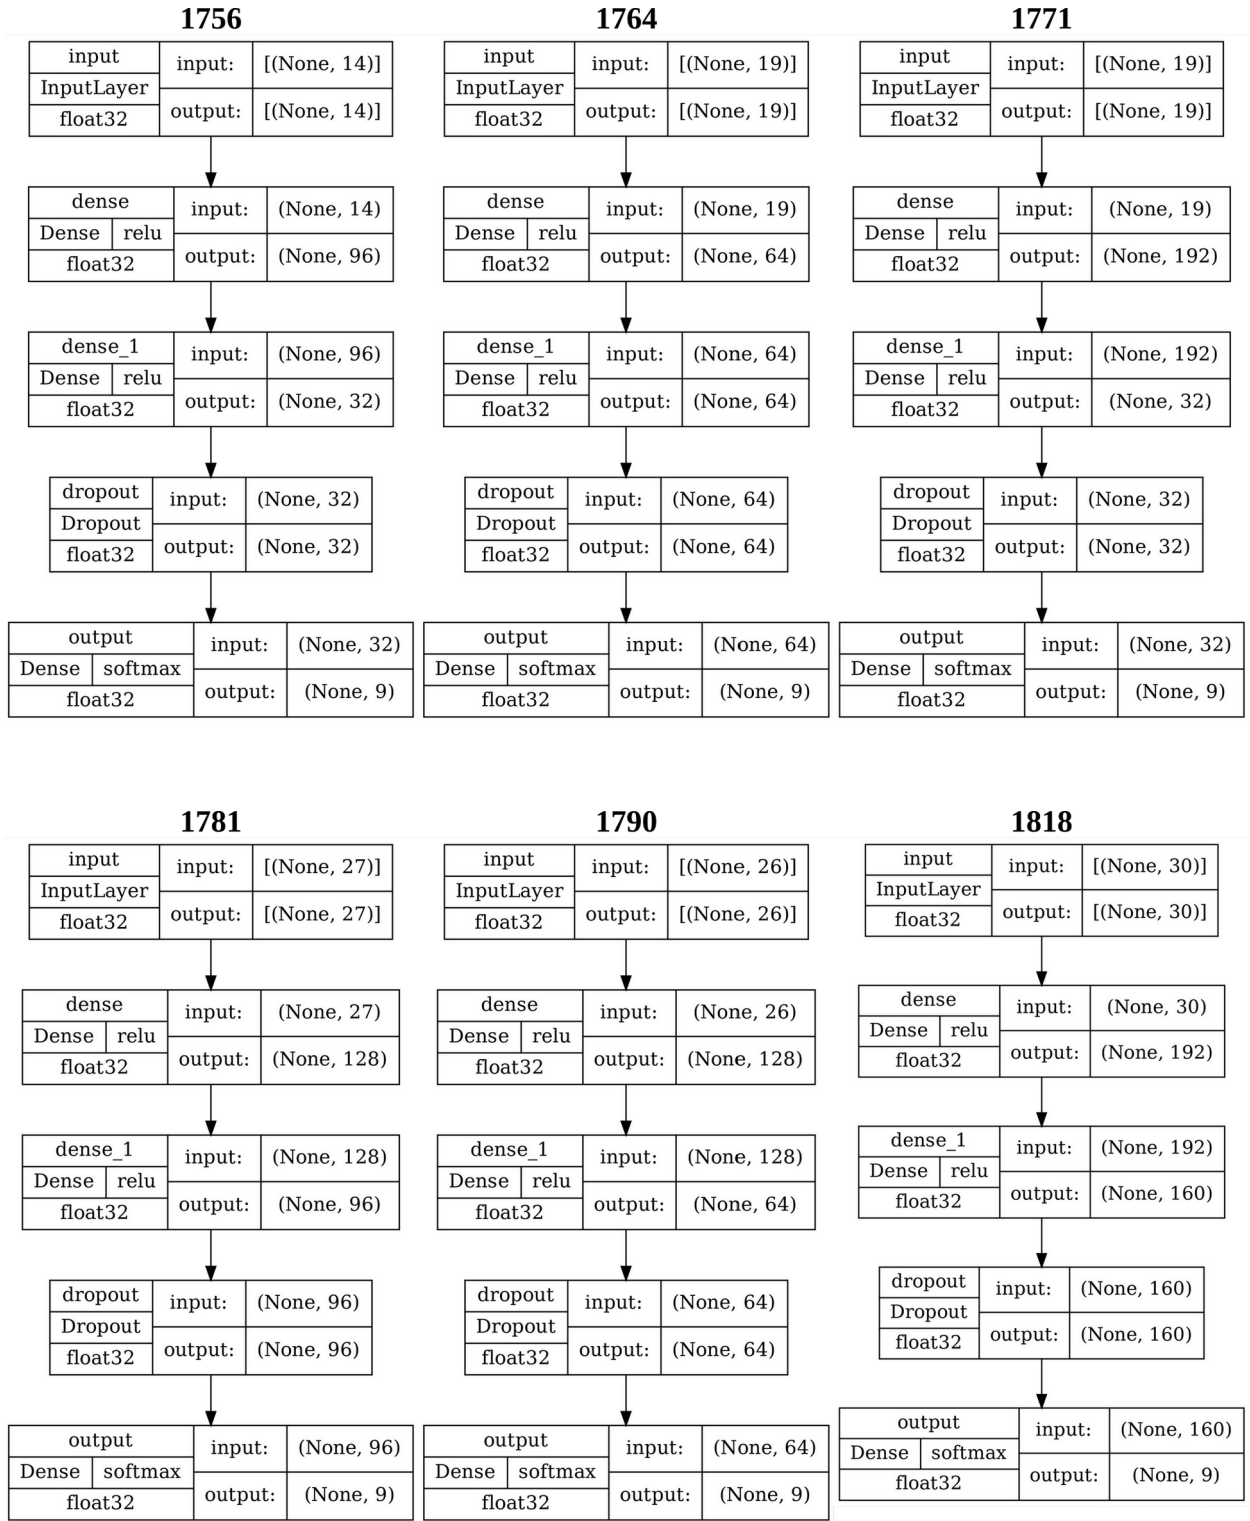



**1864**

|            |         |              |
|------------|---------|--------------|
| input      | input:  | [(None, 35)] |
| InputLayer |         |              |
| float32    | output: | [(None, 35)] |

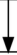

|              |         |             |
|--------------|---------|-------------|
| dense        | input:  | (None, 35)  |
| Dense   relu |         |             |
| float32      | output: | (None, 224) |

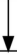

|              |         |             |
|--------------|---------|-------------|
| dense_1      | input:  | (None, 224) |
| Dense   relu |         |             |
| float32      | output: | (None, 32)  |

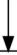

|         |         |            |
|---------|---------|------------|
| dropout | input:  | (None, 32) |
| Dropout |         |            |
| float32 | output: | (None, 32) |

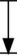

|                 |         |            |
|-----------------|---------|------------|
| output          | input:  | (None, 32) |
| Dense   softmax |         |            |
| float32         | output: | (None, 9)  |

## S.5 Additional Analyses of CAP9 Reconstructions

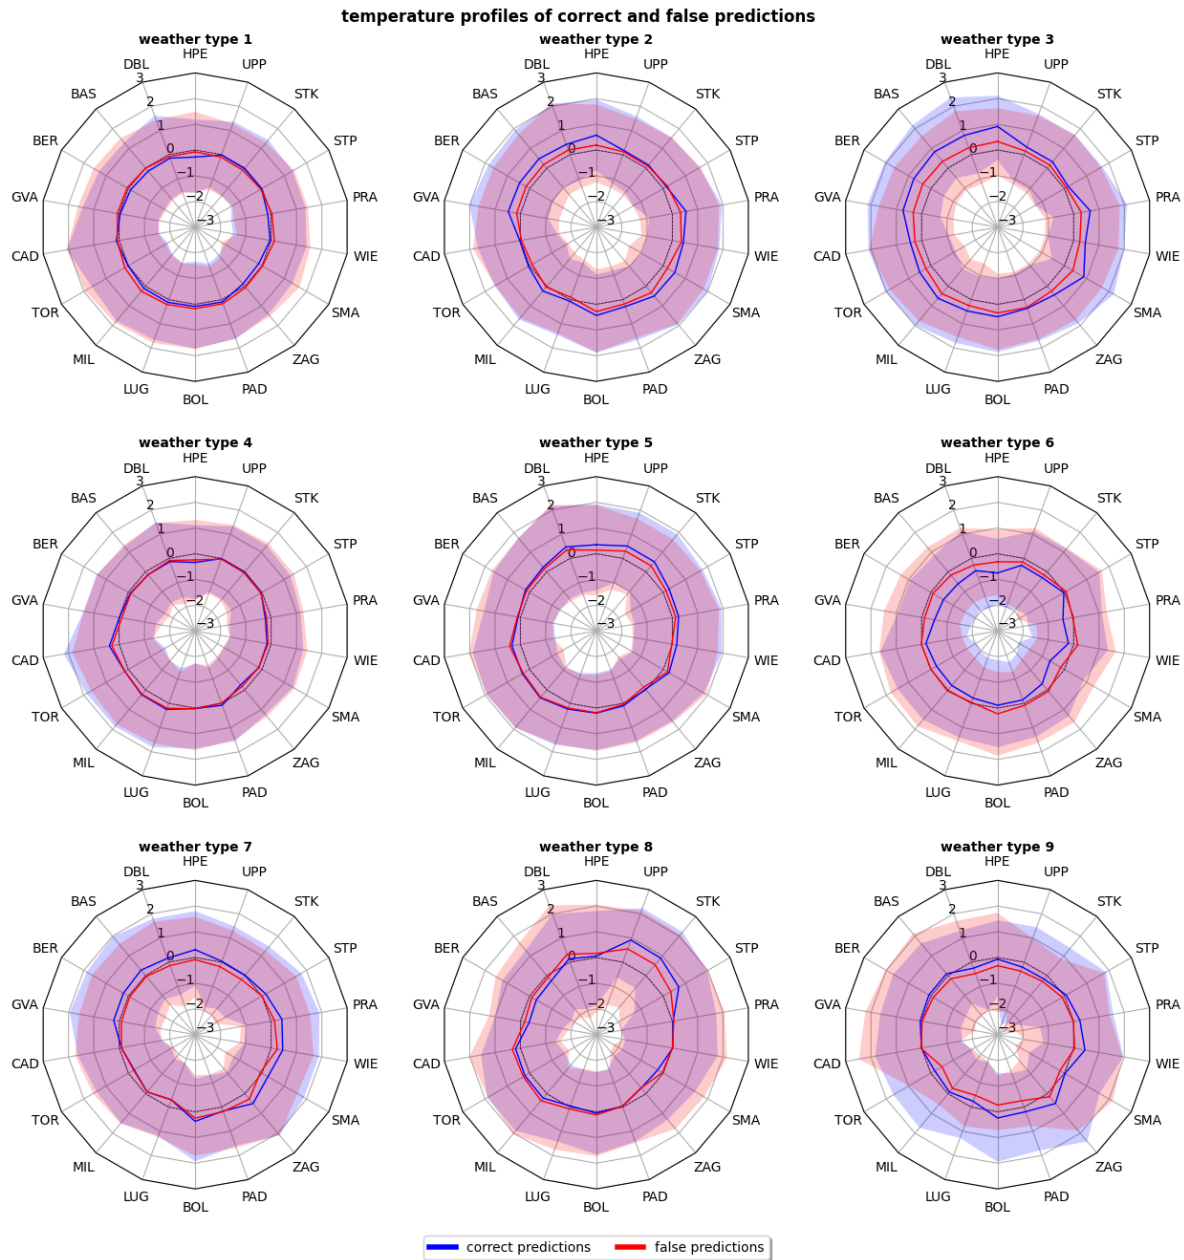

40 **Figure S5.1:** station observation profiles in standard deviations for correctly and wrongly predicted CAP9 weather types as in Fig. 4, but for temperature.

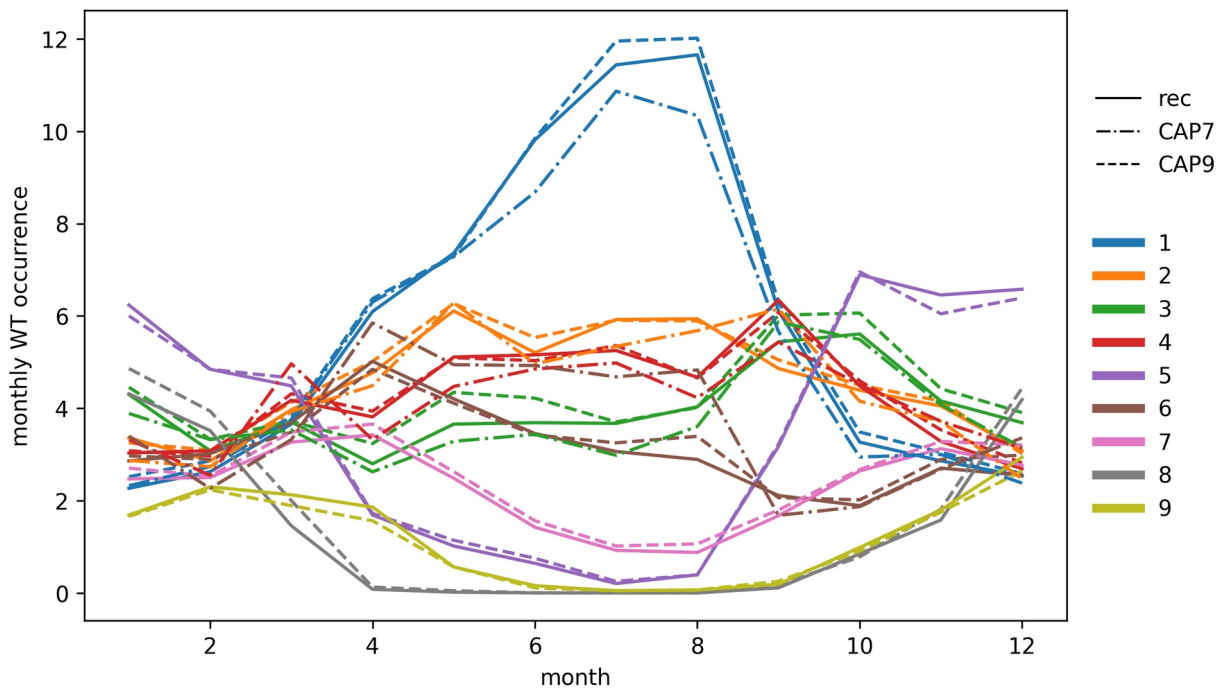

**Figure S5.2:** average WT seasonality 1957–2020 for reference CAP9 series (dashed line),  
 45 CAP9 reconstructions (solid lines), and CAP7 reconstructions (dash-dotted lines, Schwander et  
 al., 2017).
